# Supplementary material for: Metallic FeSe monolayer as an anode material for Li and non-Li ion batteries: a DFT study
Source: Royal Society of Chemistry journal article supplement (doi:10.1039/d0cp00967a), 2020-01-01
Supplement: d0cp00967a1.pdf [file d0cp00967a1.pdf]

**Supplementary Information**

**Metallic FeSe Monolayer as Anode Materials for Li and  
Non-Li Ion Batteries: A DFT Study**

Xiaodong Lv,<sup>1</sup> Fengyu Li,<sup>1,\*</sup> Jian Gong,<sup>1,\*</sup> Jinxing Gu,<sup>2</sup> Shiru Lin,<sup>2</sup>

Zhongfang Chen<sup>2,\*</sup>

<sup>1</sup> *Physical School of Science and Technology, Inner Mongolia University, Hohhot, China, 010021*

<sup>2</sup> *Department of Chemistry, The Institute for Functional Nanomaterials, University of Puerto Rico, Rio Piedras Campus, San Juan, PR 00931, USA*

\*corresponding author: [fengyuli@imu.edu.cn](mailto:fengyuli@imu.edu.cn) (FL); [ndgong@imu.edu.cn](mailto:ndgong@imu.edu.cn) (JG);  
[zhongfangchen@gmail.com](mailto:zhongfangchen@gmail.com) (ZC)

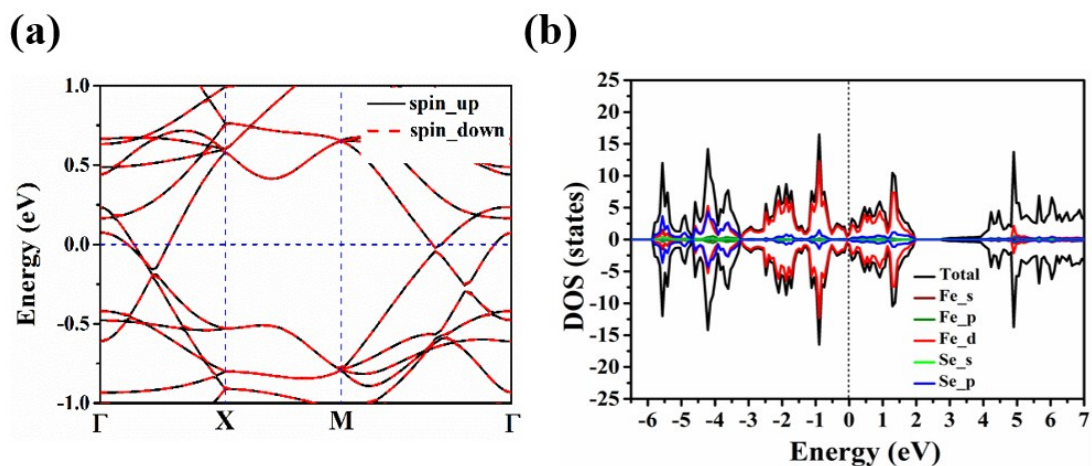

**Fig. S1** The PBE+U band structure (a) and density of state (b) for the FeSe monolayer.

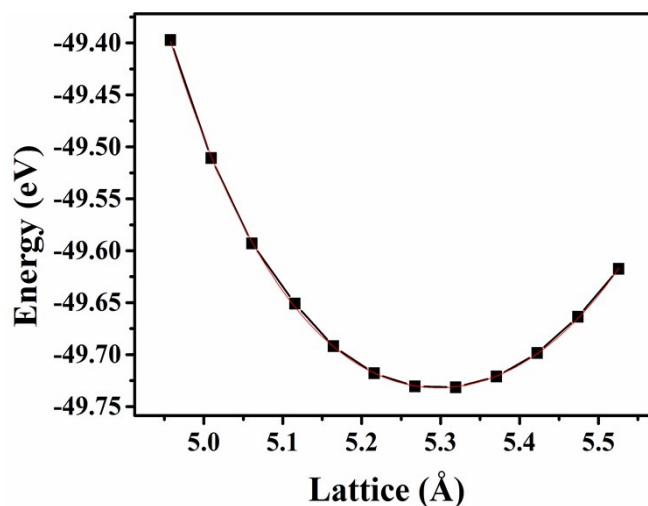

**Fig. S2** The total energy of FeSe monolayer AFM states as a function of lattice constant.

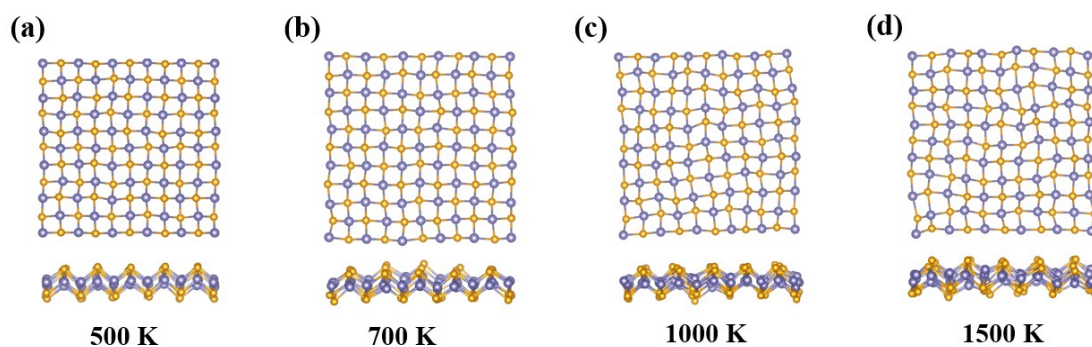

**Fig. S3** Top and side views of FeSe monolayers (a  $5 \times 5 \times 1$  supercell) at the end of the 5 ps MD simulations at the temperature of (a) 500 K (b) 700 K (c) 1000 K and (d) 1500 K, respectively.

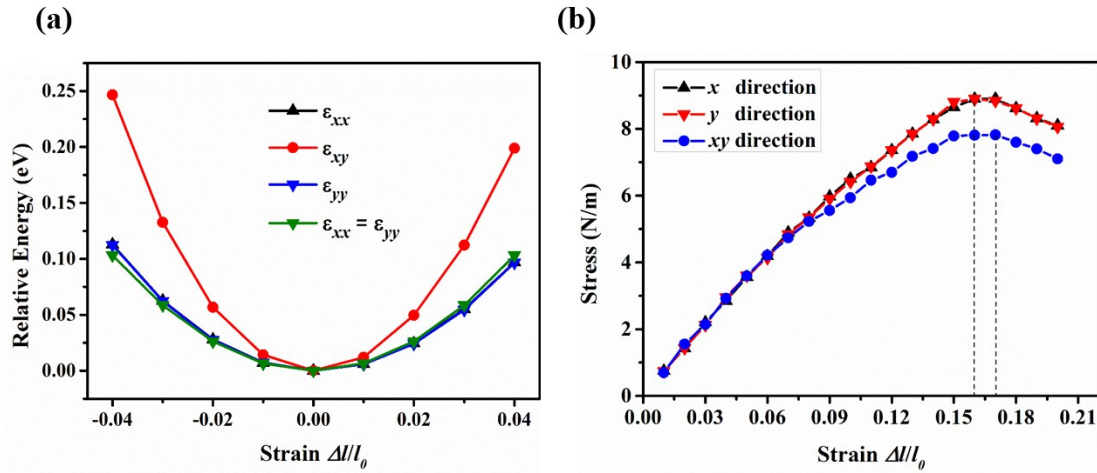

**Fig. S4** (a) The relative strain energy of monolayer FeSe under uniaxial, shear and biaxial in-plane strain ( $-4\% \leq \epsilon \leq 4\%$ ). (b) The strain-stress relation of FeSe monolayer with applying the uniaxial ( $x$  and  $y$  direction) and biaxial ( $xy$  direction) in-plane strain, respectively.

In Fig. S4a, the strain energies as a function of  $\epsilon$  in the range of  $-4\% \leq \epsilon \leq 4\%$  with an increment of 1% were computed to obtain the elastic constants, in order to calculate the Young's modulus [E. Cadelano, P. L. Palla, S. Giordano, L. Colombo, *Phys. Rev. B* 2010, **2**, 235414.].

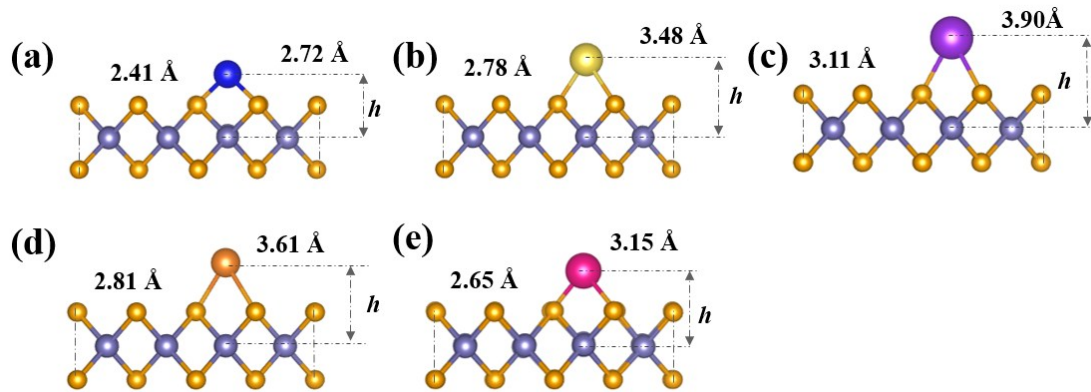

**Fig. S5** Sides views of the optimized structures of FeSe monolayer after adsorption with (a) Li, (b) Na, (c) K, (d) Mg and (e) Ca at B site.

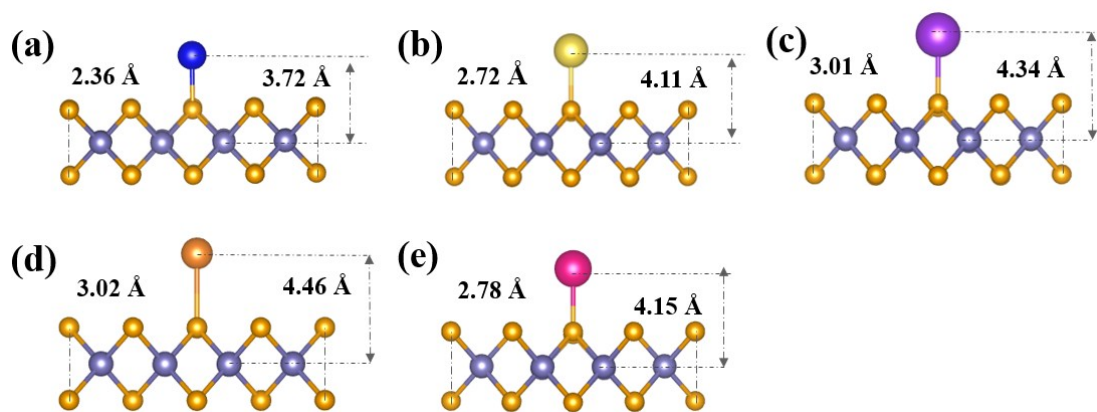

**Fig. S6** Sides views of the optimized structures of FeSe monolayer after adsorption with (a) Li, (b) Na, (c) K, (d) Mg and (e) Ca at C site.

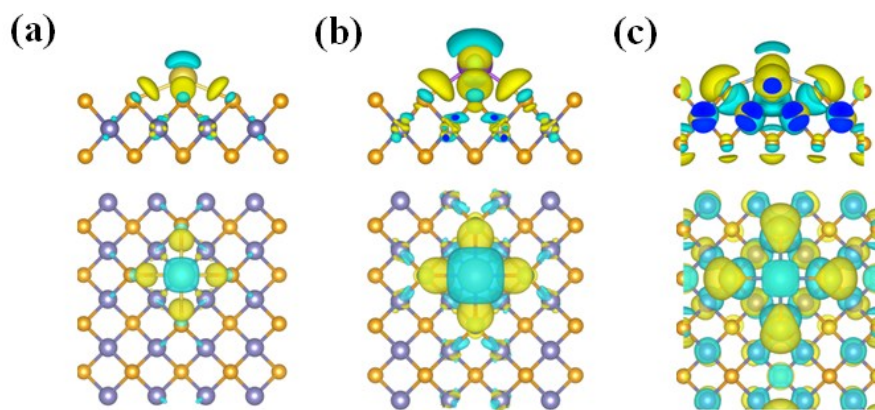

**Fig. S7** Charge density differences for M atoms adsorbed FeSe monolayer at A site, (a)  $M = \text{Na}$ , (b)  $M = \text{K}$ , (c)  $M = \text{Ca}$ . The isosurface value is set to be  $0.002 \text{ e}\text{\AA}^{-3}$ .

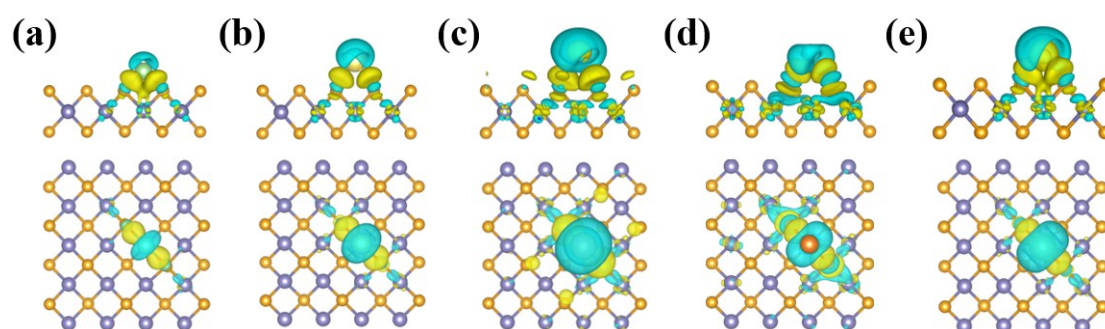

**Fig. S8** Charge density differences for M atoms adsorbed FeSe monolayer at B site, (a)  $M = \text{Li}$ , (b)  $M = \text{Na}$ , (c)  $M = \text{K}$ , (d)  $M = \text{Mg}$ , and (e)  $M = \text{Ca}$ . The isosurface value is set to be  $0.002 \text{ e}\text{\AA}^{-3}$ .



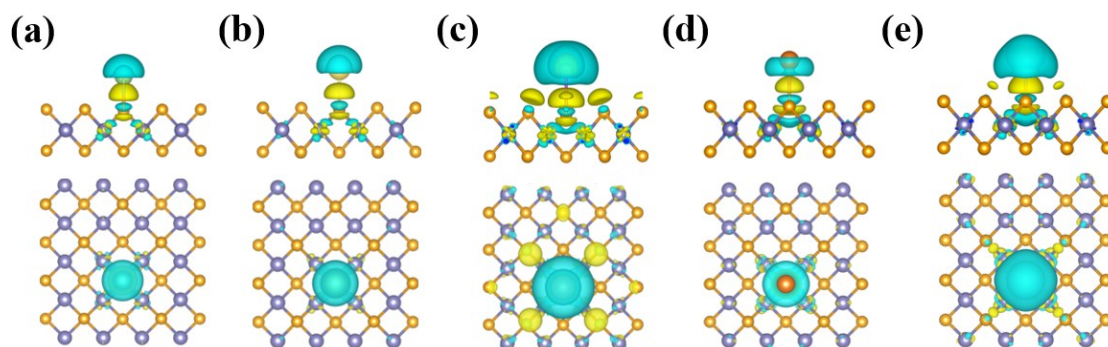

**Fig. S9** Charge density differences for  $M$  atoms adsorbed FeSe monolayer at **C** site, (a)  $M = \text{Li}$ , (b)  $M = \text{Na}$ , (c)  $M = \text{K}$ , (d)  $M = \text{Mg}$ , and (e)  $M = \text{Ca}$ . The isosurface value is set to be  $0.002 \text{ e}\text{\AA}^{-3}$ .

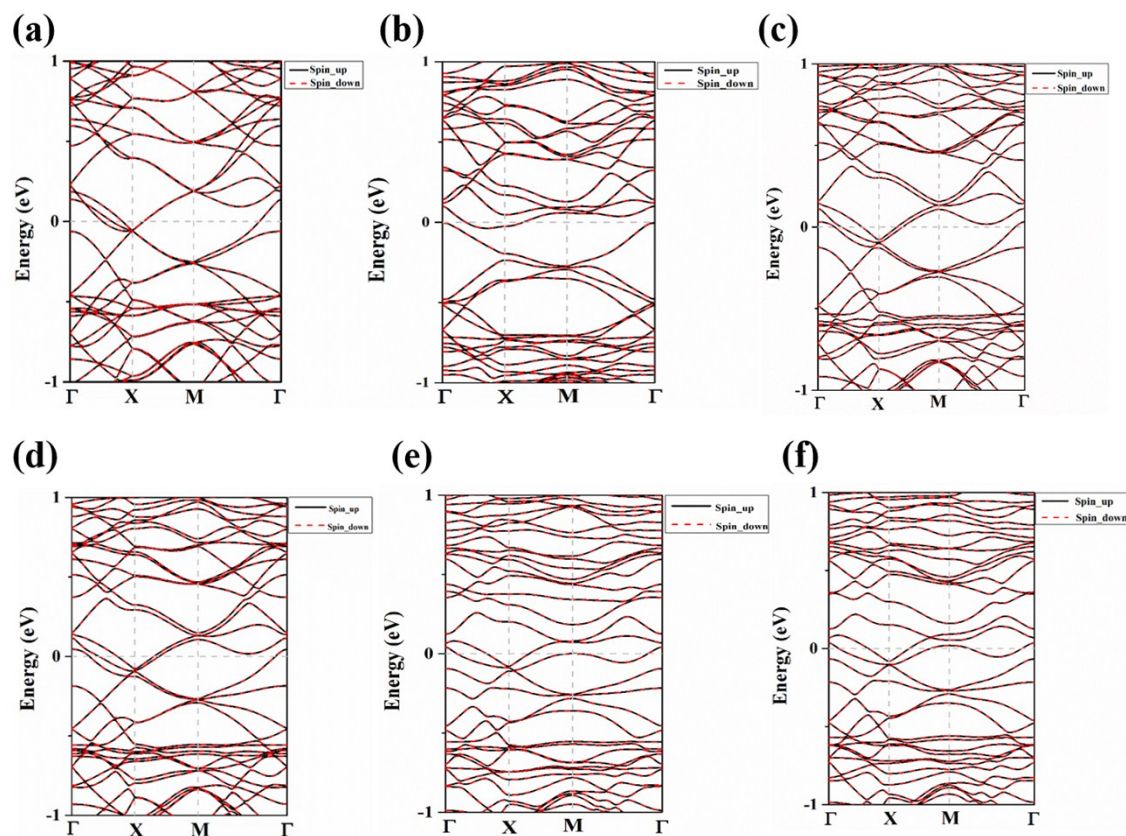

**Fig. S10** The band structures of metal atoms adsorbed FeSe monolayers, (a) pristine FeSe monolayer, (b) Li, (c) Na, (d) K, (e) Mg and (f) Ca at **A** site.

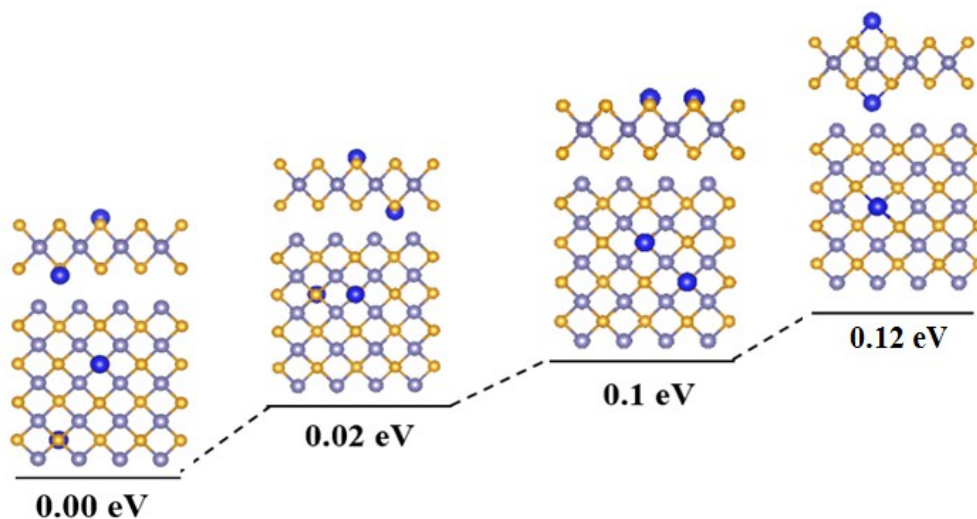

**Fig. S11** Side and top views of different configurations for  $\text{Li}_{0.125}\text{FeSe}$  as well as the relative energies.

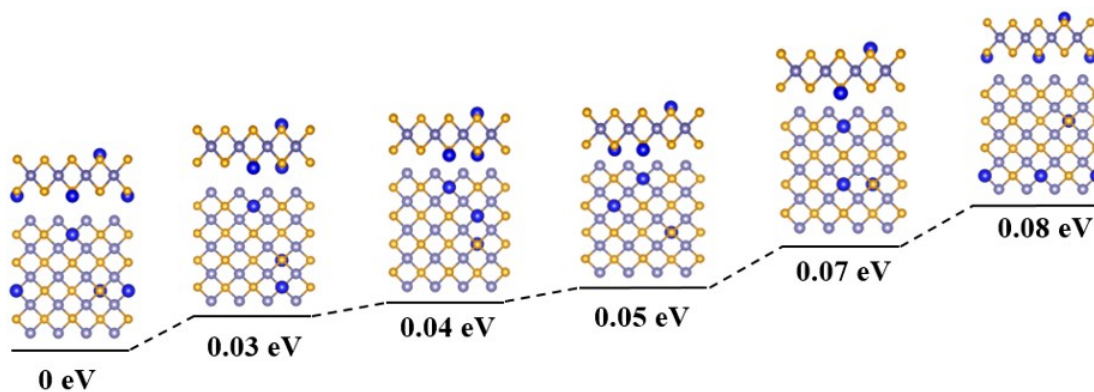

**Fig. S12** Side and top views of different configurations for  $\text{Li}_{0.187}\text{FeSe}$  as well as the relative energies.

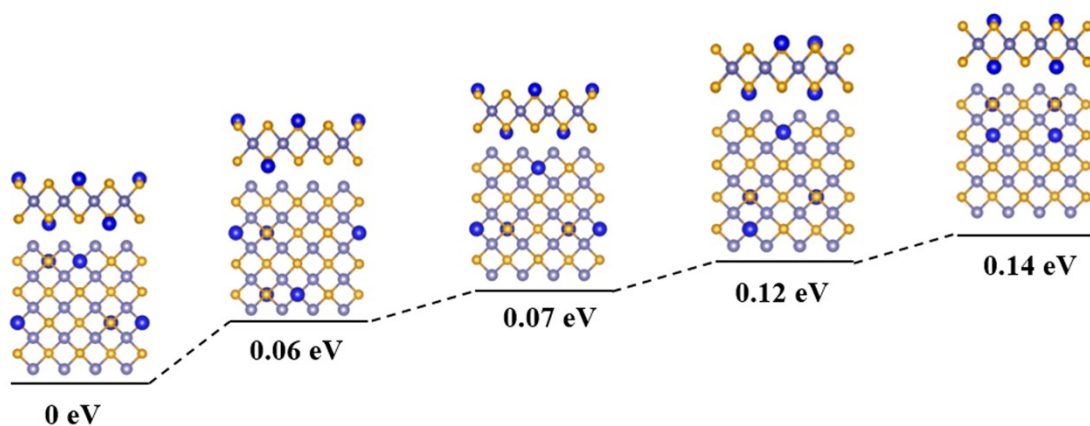

**Fig. S13** Side and top views of different configurations for  $\text{Li}_{0.25}\text{FeSe}$  as well as the relative energies.

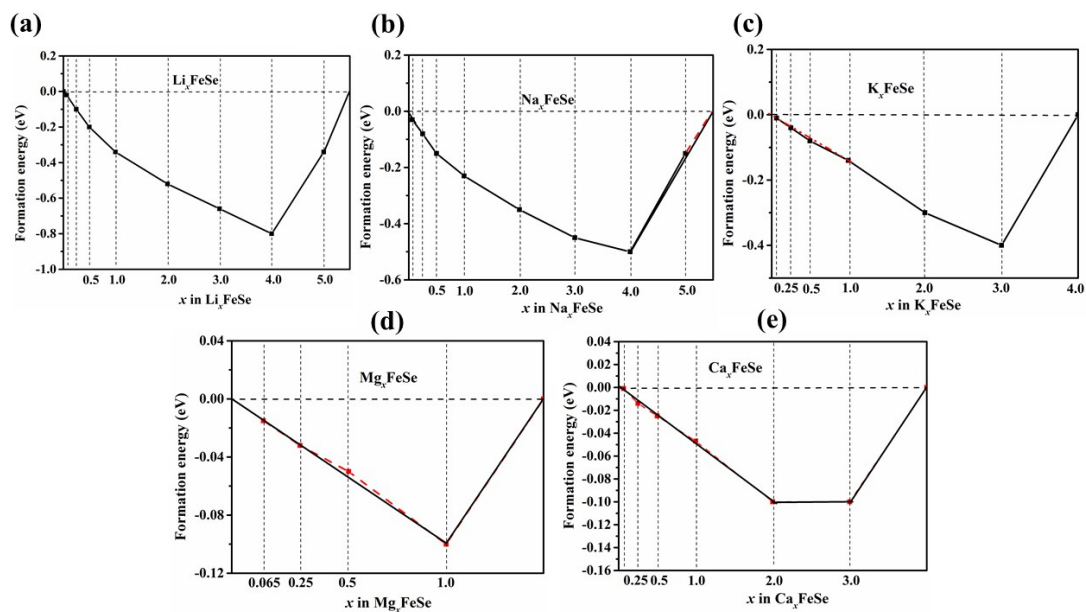

**Fig. S14** The formation energies ( $E_f$ ) of  $\text{Li}_x\text{FeSe}$  (a),  $\text{Na}_x\text{FeSe}$  (b),  $\text{K}_x\text{FeSe}$  (c),  $\text{Mg}_x\text{FeSe}$  (d) and  $\text{Ca}_x\text{FeSe}$  (e) with respect to FeSe sheet and Li/Na/K/Mg/Ca bulk metal. Data points located on the convex hull (black squares) represents the stable adsorption without decomposition. The metastable phases are indicated by red squares.

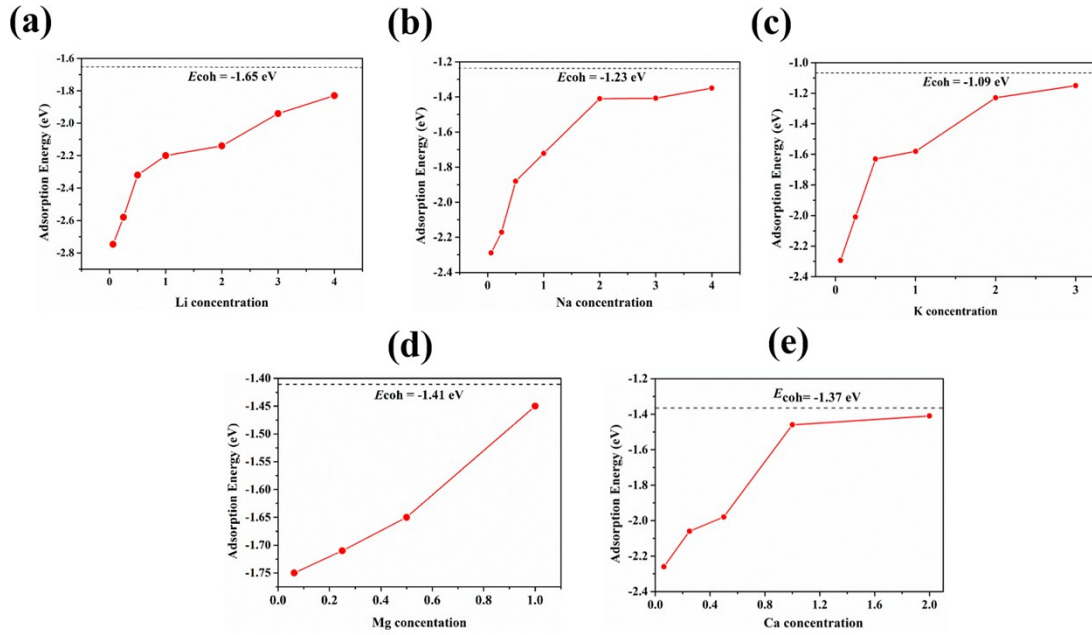

**Fig. S15** The average adsorption energies per metal atom as a function of concentration  $x$  in the (a)  $\text{Li}_x\text{FeSe}$ , (b)  $\text{Na}_x\text{FeSe}$ , (c)  $\text{K}_x\text{FeSe}$ , (d)  $\text{Mg}_x\text{FeSe}$  and (e)  $\text{Ca}_x\text{FeSe}$ . The dashed lines denote the cohesive energies of the corresponding metal atoms in the bulk phases.

Note that the average adsorption energy ( $E'_{\text{ave}}$ ) and cohesive energy in Fig. S15 are defined by the equations:  $E'_{\text{ave}} = (E_{M_x\text{FeSe}} - E_{\text{FeSe}} - xE_M)/x$ ,  $E_{\text{coh}} = (E_{\text{bulk}} - nE_M)/n$ , where  $E_{\text{FeSe}}$ ,  $E_{M_x\text{FeSe}}$ , and  $E_{\text{bulk}}$  are the total energies of monolayer FeSe,  $M$ -adsorbed FeSe, the bulk metal phase, and  $E_M$  is the energy of an isolated  $M$  atom, respectively,  $x$  is the number of adsorption atoms,  $n$  is the number of  $M$  atoms in its bulk phase.



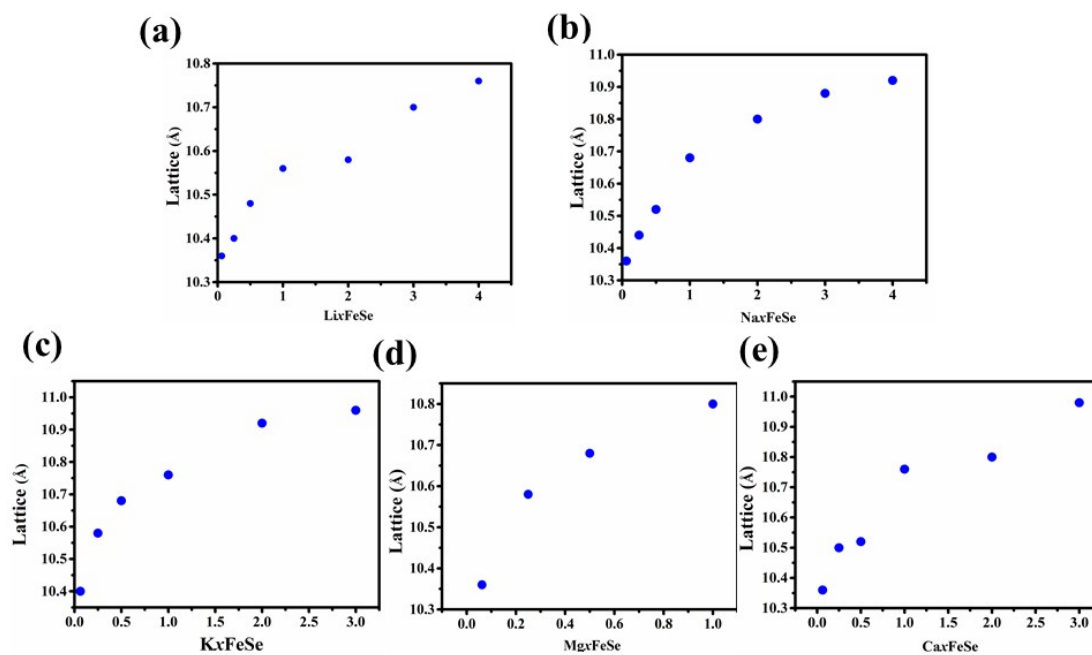

**Fig. S16** The lattice constant variation as the function of  $M$  concentration  $x$ : (a)  $\text{Li}_x\text{FeSe}$ , (b)  $\text{Na}_x\text{FeSe}$ , (c)  $\text{K}_x\text{FeSe}$ , (d)  $\text{Mg}_x\text{FeSe}$  and (e)  $\text{Ca}_x\text{FeSe}$ .

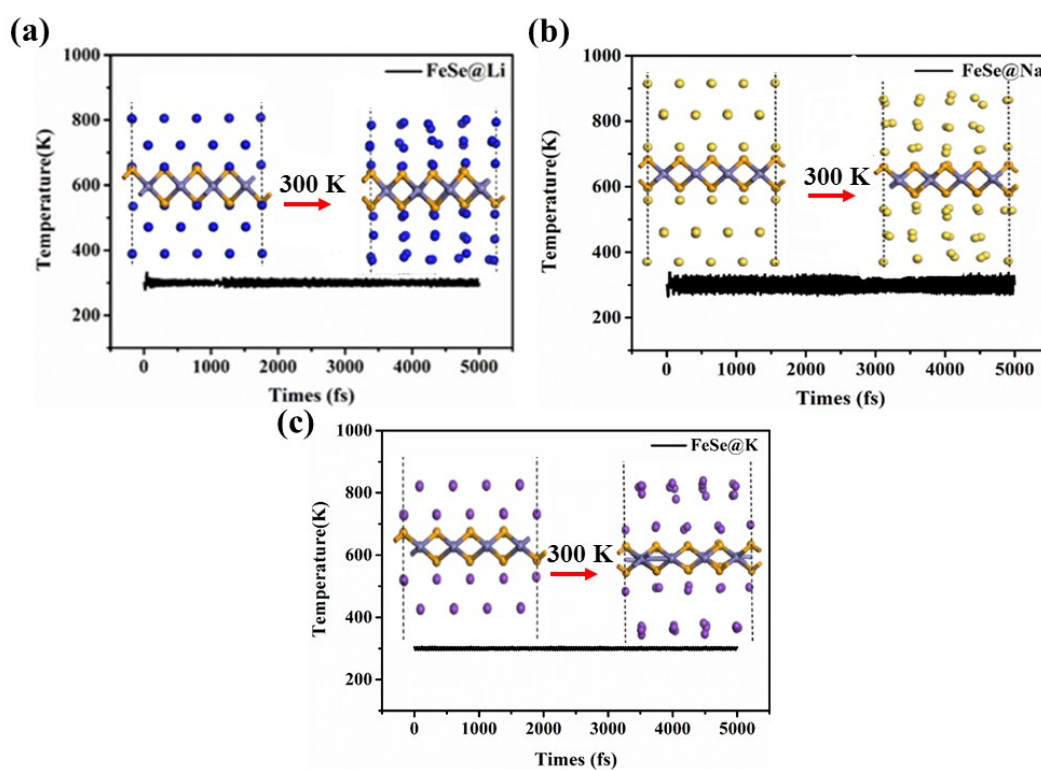

**Fig. S17** The side views of the intercalated FeSe electrode by (a) Li, (b) Na, and (c) K atoms at the end of FPMD simulation, performed at 300 K.

**Table S1.** The calculated relative energies (in eV) of Li adsorbed at **A**, **B**, and **C** sites on the FeSe monolayer by BPE and PBE+U methods.

| Methods | A    | B    | C    |
|---------|------|------|------|
| PBE     | 0.00 | 0.17 | 0.94 |
| PBE+U   | 0.00 | 0.19 | 0.95 |

**Table S2.** In-plane stiffness ( $C_{11}$ ,  $C_{22}$ ,  $C_{12}$ ,  $C_{66}$ , in N/m) and the Young's modulus ( $Y$ , in N/m) of the FeSe monolayers.

| System           | $C_{11}$ | $C_{22}$ | $C_{12}$ | $C_{66}$ | $Y$    |
|------------------|----------|----------|----------|----------|--------|
| FeSe             | 79.38    | 79.38    | 5.25     | 19.52    | 79.03  |
| MoS <sub>2</sub> | 132.58   | 132.58   | 32.96    | 49.69    | 124.39 |

**Table S3.** The adsorption energy  $E_{\text{ads}}$  (in eV) of metal atom and the electron transfer (in  $e^-$ ) from the adatoms to FeSe monolayer at the site **A**, **B**, and **C** at the PBE (PBE+U) level of theory. The largest  $E_{\text{ads}}$  are given in bold.

| Metal | $E_{\text{ads}}$ (A) | $E_{\text{ads}}$ (B) | $E_{\text{ads}}$ (C) | Q (A) | Q (B) | Q(c) |
|-------|----------------------|----------------------|----------------------|-------|-------|------|
| Li    | <b>-2.75 (-3.60)</b> | -2.58 (-3.41)        | -1.81 (-2.66)        | 0.93  | 0.91  | 0.88 |
| Na    | <b>-2.29 (-3.05)</b> | -2.16 (-2.95)        | -1.58 (-2.34)        | 0.91  | 0.85  | 0.81 |
| K     | <b>-2.28 (-3.40)</b> | -2.18 (-3.28)        | -1.83 (-2.97)        | 0.92  | 0.89  | 0.88 |
| Mg    | <b>-1.65 (-3.32)</b> | -0.51 (-2.47)        | -0.29 (-1.65)        | 1.52  | 0.71  | 0.35 |
| Ca    | <b>-2.26 (-3.33)</b> | -0.73 (-1.80)        | -0.22 (-0.85)        | 1.39  | 0.83  | 0.36 |

**Table S4** The electron transfer (in  $e^-$ ) from the metal atoms ( $M = \text{Li, Na, K, Mg}$  and  $\text{Ca}$ ) to the FeSe monolayer and the Cl atom in their chlorides (LiCl, NaCl, KCl, MgCl<sub>2</sub> and CaCl<sub>2</sub>).

|      | Li   | Na   | K    | Mg   | Ca   |
|------|------|------|------|------|------|
| FeSe | 0.93 | 0.91 | 0.92 | 1.52 | 1.39 |
| Cl   | 0.92 | 0.86 | 0.88 | 1.61 | 1.56 |

**Table S5.** The average adsorption energy ( $E'_{\text{ave}}$ , in eV) for  $M$  multi-layer adsorption in the stoichiometry of  $M_x\text{FeSe}$  and the cohesive energy ( $E_{\text{coh}}$ , in eV) of  $M$  in bulk phase.

| $M_x\text{FeSe}$      | Li    | Na    | K     | Mg    | Ca    |
|-----------------------|-------|-------|-------|-------|-------|
| $M\text{FeSe}$        | -2.20 | -1.72 | -1.58 | -1.45 | -1.46 |
| $M_2\text{FeSe}$      | -2.14 | -1.43 | -1.23 | -1.40 | -1.44 |
| $M_3\text{FeSe}$      | -1.94 | -1.41 | -1.15 | -1.38 | -1.41 |
| $M_4\text{FeSe}$      | -1.83 | -1.35 | -1.06 | –     | -1.35 |
| $E_{\text{coh}}$ (eV) | -1.65 | -1.23 | -1.09 | -1.41 | -1.37 |

**Table S6.** Changes in the lattice parameters and volume during the intercalation process of LIBs, NIBs, KIBs, MIBs, and CIBs.

| System               | Lattice (Å) | Expansion (Lattice) |
|----------------------|-------------|---------------------|
| FeSe                 | 10.35       | --                  |
| Li <sub>4</sub> FeSe | 10.76       | 3.90%               |
| Na <sub>4</sub> FeSe | 10.92       | 5.50%               |
| K <sub>3</sub> FeSe  | 10.95       | 5.79%               |
| MgFeSe               | 10.79       | 4.25%               |
| Ca <sub>3</sub> FeSe | 10.97       | 5.99%               |
